# Supplementary material for: Celf1 Is Required for Formation of Endoderm-Derived Organs in Zebrafish
Source: Int J Mol Sci. 2013 Sep 3;14(9):18009–23. doi: 10.3390/ijms140918009 (PMC3794766; doi:10.3390/ijms140918009)
Supplement: Supplementary File 1 — Supplementary (ZIP, 27778 KB) [file ijms-14-18009-s001.zip]

Archive with 4 entries (3 files):
- ijms-37472-final-suppl/
- ijms-37472-final-suppl/ijms-37472-final-suppl..pdf
- ijms-37472-final-suppl/movie1.mov
- ijms-37472-final-suppl/movie2.mov
